# Supplementary material
Source: MDPI journal article supplement (https://www.mdpi.com/2073-445X/6/4/69)
Supplement: s1 [file s1]

Supplementary material Table S1. List of species and pseudospecies registered 1-m2 sampling plots on pastures grazed by horses in three study areas in Southern Finland. The numbers provide frequency of occurrence of the respective sample sizes. Groups are: species that are known to be eaten by horses (E), species that are avoided (A), species that are preferred by horses and consumed in considerable amounts (Pr ) (all three lists are based on O’Beirne, 2005; Jansson, 1995; own observations), species identified as positive (PI) and negative indicators (NI) for semi-natural grasslands in the Southern Finland (i.e., indicating nature values; Pykälä, 2001).

Species Ypäjä Savijärvi Särkisaari Group

n = 44 n = 33 n = 9

Acer platanoides 0 3.0 0

Achillea millefolium 78.9 21.2 38.5 E

Achillea ptarmica 29.8 3.0 0 NI

Aegopodium podagraria 0 3.0 38.5 NI

Agrostis capillaris 28.1 0 7.7 E Pr

Agrostis sp. 19.3 42.4 15.4 E Pr

Alchemilla sp. 31.6 6.1 15.4 PI

Alnus glutinosa 1.8 0 0

Alnus incana 3.5 0 7.7

Alopecurus geniculatus 0 33.3 0 NI

Alopecurus pratensis 42.1 6.1 0 E Pr NI

Alopecurus sp. 7.0 0 7.7

Anemone nemorosa 14.0 0 0 PI

Anthoxanthum odoratum 3.5 0 0

Anthriscus sylvestris 8.8 0 53.8 NI

Betula pendula 3.5 0 0 E

Betula pubescens 3.5 0 0 E

Bidens tripartita 1.8 0 0

Calamagrostis epigejos 1.8 0 0 E

Calamagrostis purpurea 0 0 7.7 E

Calluna vulgaris 0 0 0

Caltha palustris 0 0 0 A PI

Carex ericetorum 1.8 0 0 E

Carex nigra 22.8 6.1 0 E Pr PI

Carex ovalis 1.8 3.0 0 E

Carex pallescens 19.3 0 0 E PI

Carex panicea 1.8 0 0 E PI

Carex pilulifera 1.8 0 0 E

Carex vesicaria 0 0 15.4 E

Carex sp. 5.3 0 0 E

Carum carvi 22.8 0 0 A

Centaurea jacea 0 3.0 0 PI

Cerastium arvense 5.3 0 0

Cerastium fontanum 31.6 15.2 0

Cirsium arvense 0 0 30.8 E NI

Dactylis glomerata 1.8 0 0 E Pr NI

Deschampsia cespitosa 22.8 63.6 7.7 E

Dryopteris carthusiana 1.8 0 0

Eleocharis palustris 0 0 7.7

Elymus repens 12.3 6.1 46.2 Pr NI

Equisetum fluviatile 0 3.0 7.7

Equisetum pratense 1.8 0 0 PI

Equisetum sylvaticum 1.8 0 0

Festuca ovina 12.3 0 0 E Pr PI

Festuca pratensis 7.0 15.2 23.1 E Pr NI

Festuca rubra 22.8 0 0 E Pr PI

Filipendula ulmaria 14.0 6.1 0 A

Fragaria vesca 3.5 0 0 PI

Frangula alnus 1.8 0 0

Galeopsis speciosa 0 0 7.7 NI

Galium album 1.8 0 0 PI

Galium boreale 3.5 0 0 PI

Galium spurium 3.5 0 0

Galium palustre 0 6.1 7.7

Galium uliginosum 12.3 0 0

Geranium sylvaticum 10.5 0 7.7 A

Geum rivale 7.0 3.0 0

Glyceria fluitans 0 3.0 0

Hieracium sp. 1.8 0 0

Hypericum maculatum 1.8 0 0 PI

Hydrocharis morsus-ranae 0 0 7.7

Lamium album 1.8 0 0

Lathyrus pratensis 29.8 0 0 PI

Leontodon autumnalis 24.6 63.6 0 NI

Leucanthemum vulgare 7.0 0 0 A

Lolium perenne 0 3.00 0 E Pr

Luzula multiflora 8.8 0 0 PI

Luzula pilosa 7.0 0 0 PI

Lycopus europaeus 0 3.0 7.7

Lysimachia thyrsiflora 0 0 7.7

Lysimachia vulgaris 0 0 7.7

Lythrum salicaria 0 0 15.4

Maianthemum bifolium 10.5 0 0 PI

Matricaria matricarioides 1.8 15.2 0 NI

Melampyrum pratense 1.8 0 0 PI

Melampyrum sylvaticum 3.5 0 0 PI

Nardus stricta 3.5 0 0 E

Oxalis acetosella 3.5 0 0

Persicaria lapathifolia 0 27.3 0 NI

Phleum pratense 31.6 45.5 61.5 E Pr

Pilosella sp. 0 0 0 PI

Pimpinella saxifraga 1.8 0 0 PI

Plantago major 12.3 72.7 7.7 A NI

Poa annua 12.3 6.1 0 E Pr NI

Poa palustris 3.5 0 0 E Pr

Poa pratensis 42.1 90.9 53.8 E Pr PI

Poa sp. 1.8 0 0 E Pr

Poa trivialis 12.3 3.0 7.7 E Pr

Polygonum aviculare 1.8 6.1 0 E

Populus tremula 0 0 7.7

Potentilla anserina 14.0 6.1 0

Potentilla argentea 1.8 0 0 PI

Potentilla erecta 28.1 0 0 A PI

Potentilla palustris 0 0 7.7

Prunella vulgaris 14.0 0 0 A PI

Pteridium aquilinum 1.8 0 0 E

Ranunculus acris 50.9 6.1 0 A

Ranunculus auricomus 12.3 3.0 0 A

Ranunculus phallax 0 0 7.7 A

Ranunculus polyanthemos 1.8 0 0 A PI

Ranunculus repens 33.3 51.5 46.2 A NI

Rhinanthus minor 10.5 0 0 A PI

Rhinanthus serotinus 10.5 0 0 A

Rhinanthus sp. 7.0 0 0 A

Rubus arcticus 5.3 0 0 E PI

Rubus idaeus 7.0 0 0 E NI

Rubus sp. 1.8 0 0 E

Rumex acetosa 19.3 3.0 0 A PI

Rumex acetosella 15.8 0 0 A PI

Rumex longifolius 5.3 3.0 0 A NI

Sagina sp. 1.8 0 0

Salix sp. 1.8 0 0 E

Scirpus sylvaticus 0 0 7.7

Scutellaria galericulata 0 18.2 0

Solidago virgaurea 1.8 0 0 PI

Stellaria graminea 47.4 6.1 0

Stellaria holostea 1.8 0 0

Stellaria media 0 3.0 0 NI

Stellaria palustris 0 0 7.7

Stellaria sp. 1.8 0 0

Taraxacum sp. 54.4 30.3 76.9 E Pr NI

Trientalis europaea 7.0 0 0 PI

Trifolium medium 1.8 0 0 E Pr PI

Trifolium pratense 3.5 3.0 0 E Pr

Trifolium repens 57.9 87.9 15.4 E Pr NI

Urtica dioica 1.8 0 15.4 E NI

Vaccinium myrtillus 1.8 0 0 A PI

Vaccinium vitis-idaea 5.3 0 0 PI

Veronica chamaedrys 64.9 6.1 7.7 A

Veronica officinalis 5.3 0 0 A

Veronica serpyllifolia 7.0 12.1 7.7 A

Vicia cracca 22.8 0 0 E Pr PI

Vicia sepium 7.0 0 0 E Pr PI

Viola canina ssp montana 21.1 0 0 E Pr PI

Viola palustris 15.8 0 0 E PI
